# Supplementary material for: Toxicity of Modified Magnetite-Based Nanocomposites Used for Wastewater Treatment and Evaluated on Zebrafish (Danio rerio) Model
Source: MDPI journal article supplement (doi:10.3390/nano12030489), 2022-01-29
Supplement: s1 [file s1]

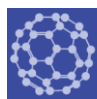

Supplementary Materials

# Toxicity of Modified Magnetite-Based Nanocomposites Used for Wastewater Treatment and Evaluated on Zebrafish (*Danio rerio*) Model

Amaimen Guillén <sup>1,2</sup>, Yeferzon Ardila <sup>2</sup>, Mabel Juliana Noguera <sup>1</sup>, Ana Lucía Campaña <sup>1</sup>, Miranda Bejarano <sup>2</sup>,  
Veronica Akle <sup>2</sup> and Johann F. Osma <sup>1,\*</sup>

<sup>1</sup> CMUA, Department of Electrical and Electronic Engineering, Universidad de los Andes, Cra. 1E No. 19a-40, Bogotá, DC 111711, Colombia; aa.guillon@uniandes.edu.co (A.G.); mj.noguera10@uniandes.edu.co (M.J.N.); al.campana10@uniandes.edu.co (A.L.C.)

<sup>2</sup> Neuroscience and Circadian Rhythms Laboratory, School of Medicine, Universidad de los Andes, Cra 1 No. 18a-10, Bogotá, DC 111711, Colombia; ya.ardila@uniandes.edu.co (Y.A.); sm.bejarano@uniandes.edu.co (M.B.); v.akle@uniandes.edu.co (V.A.)

\* Correspondence: jf.osma43@uniandes.edu.co; Tel.: +57-601-339-4949

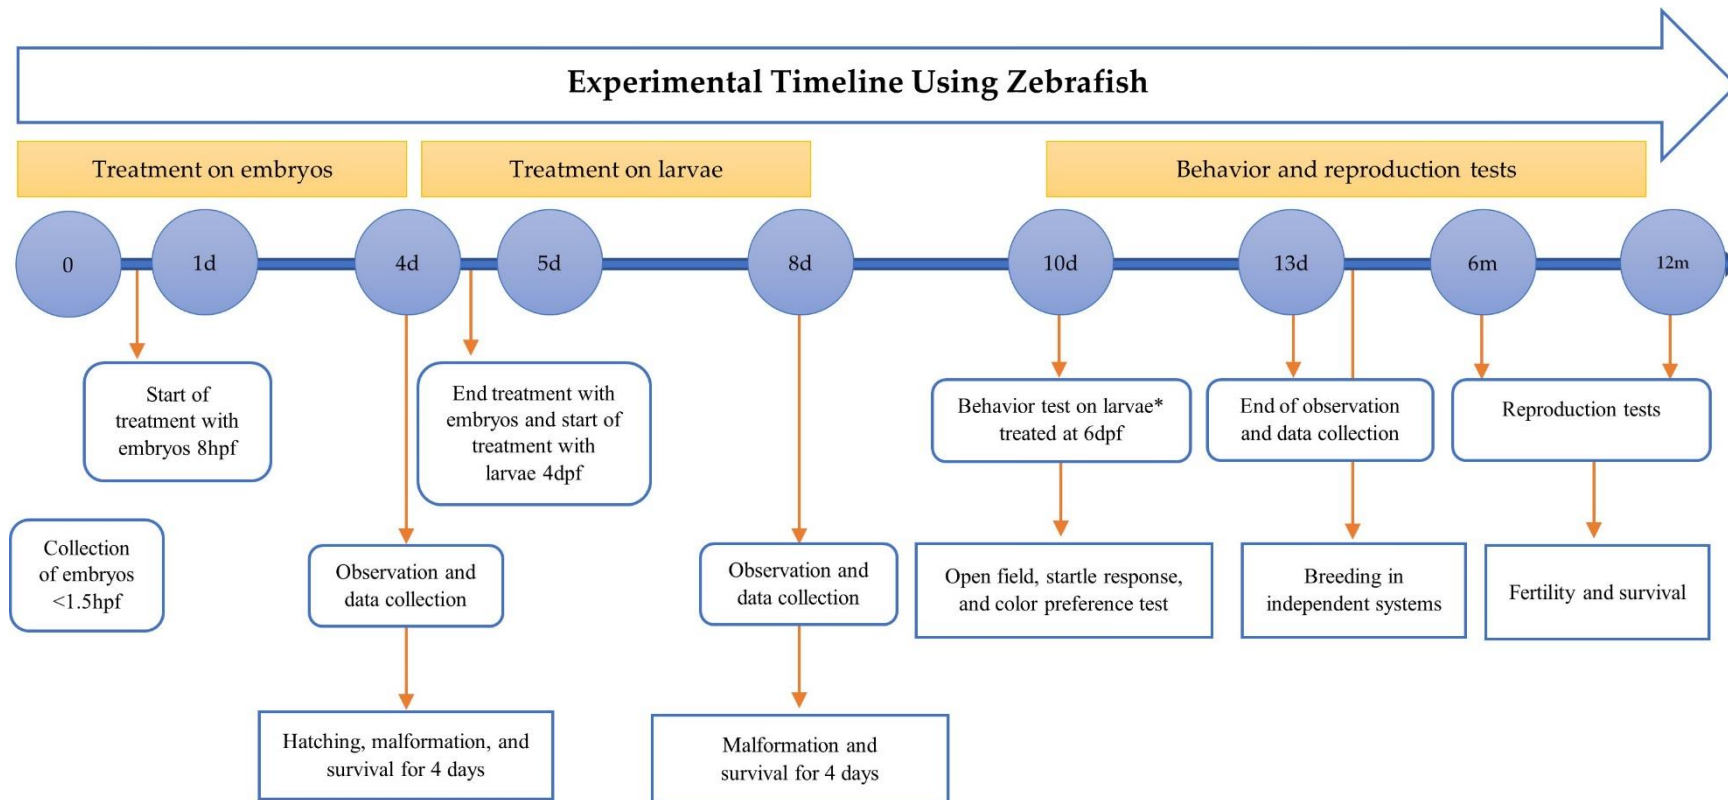

**Figure 1.** Representation of experimental timeline. Notes (hpf: hours postfertilization, dpf: days postfertilization and mpf: months postfertilization). \*After behavioral testing, these larvae are euthanized.
